# Supplementary material for: D‐dimer testing for early detection of venom‐induced consumption coagulopathy after snakebite in Australia (ASP‐29)
Source: PubMed Central journal article supplement — Med J Aust. 2022 Jun 7;217(4):203–7. doi: 10.5694/mja2.51589 (PMC9541317; doi:10.5694/mja2.51589), 2022-06-07

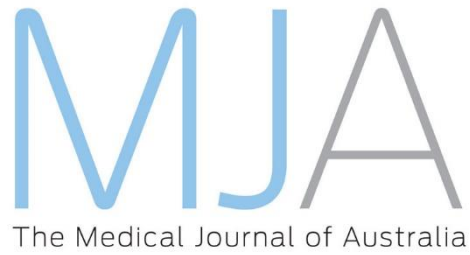

## **Supporting Information**

### **Supplementary results**

**This appendix was part of the submitted manuscript and has been peer reviewed. It is posted as supplied by the authors.**

Appendix to: Isbister GK, Noutsos T, Jenkins S, et al. D-dimer testing for early detection of venom-induced consumption coagulopathy after snakebite in Australia (ASP-29). *Med J Aust* 2022; doi: 10.5694/mja2.51589.

Figure. Area under the receiver operating characteristic (ROC) curves for diagnosis of venom-induced consumption coagulopathy using D-dimer value, A. By number of hours since bite; B. By time period since bite

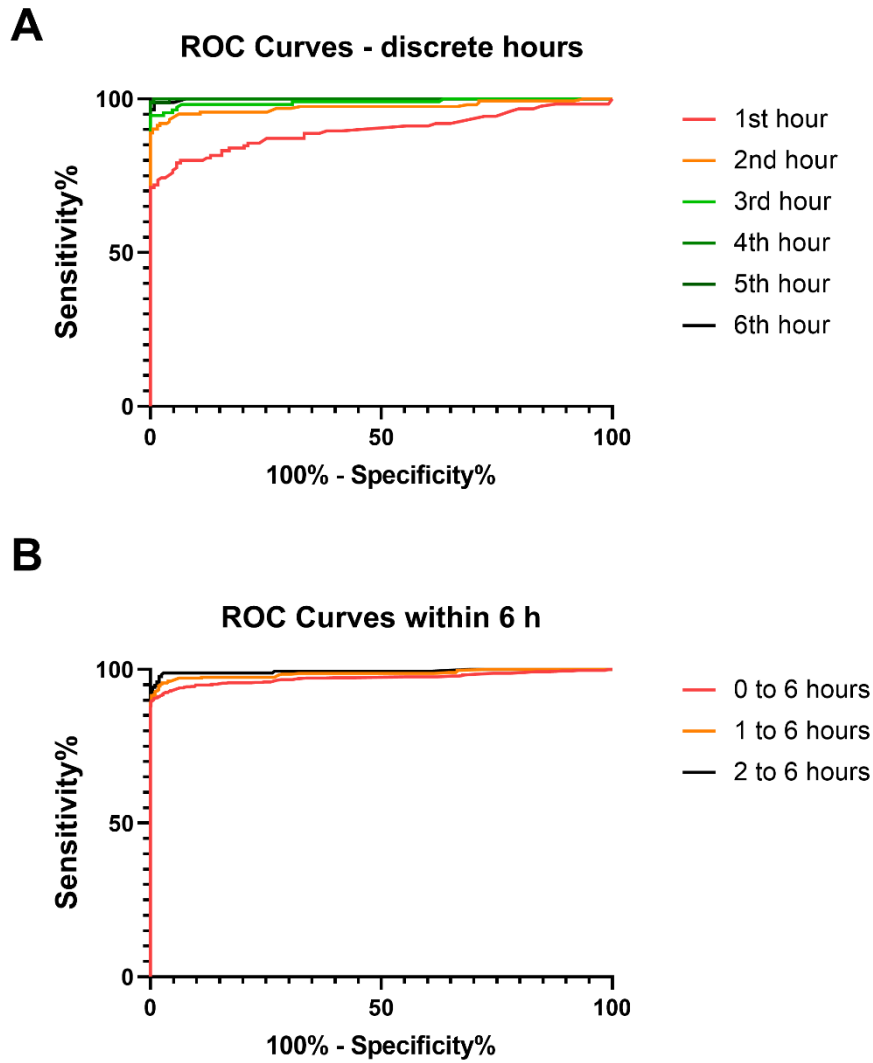

Supplement: MJA2-217-203-s001.pdf [file MJA2-217-203-s001.pdf]
